# Supplementary material for: Simultaneously enhancing the crystallization rate and fire retardancy of poly(lactic acid) by using a novel bifunctional additive trimethylamine phenylphosphonate
Source: Royal Society of Chemistry journal article supplement (doi:10.1039/d1ra02862f), 2021-01-01
Supplement: d1ra02862f1.pdf [file d1ra02862f1.pdf]

## Supporting Information

### **Simultaneously regulating the crystallizing and combustion behaviors of Poly(lactic acid) by incorporating simply prepared trimethylamine phenylphosphonate**

*Qin Jin, Guo-Qiang Tian, Rong He, Hai-Long Gu, Zhu, Jiang, Fang Wu \**

*Chongqing Key Laboratory of Materials Surface & Interface Science, School of  
Materials Science and Engineering, Chongqing University of Arts and Sciences,  
Chongqing 402160, P. R. China. Email: wjjustdoit@163.com, Tel/Fax numbers: 86-*

*023-15123252084, 023-49512058*

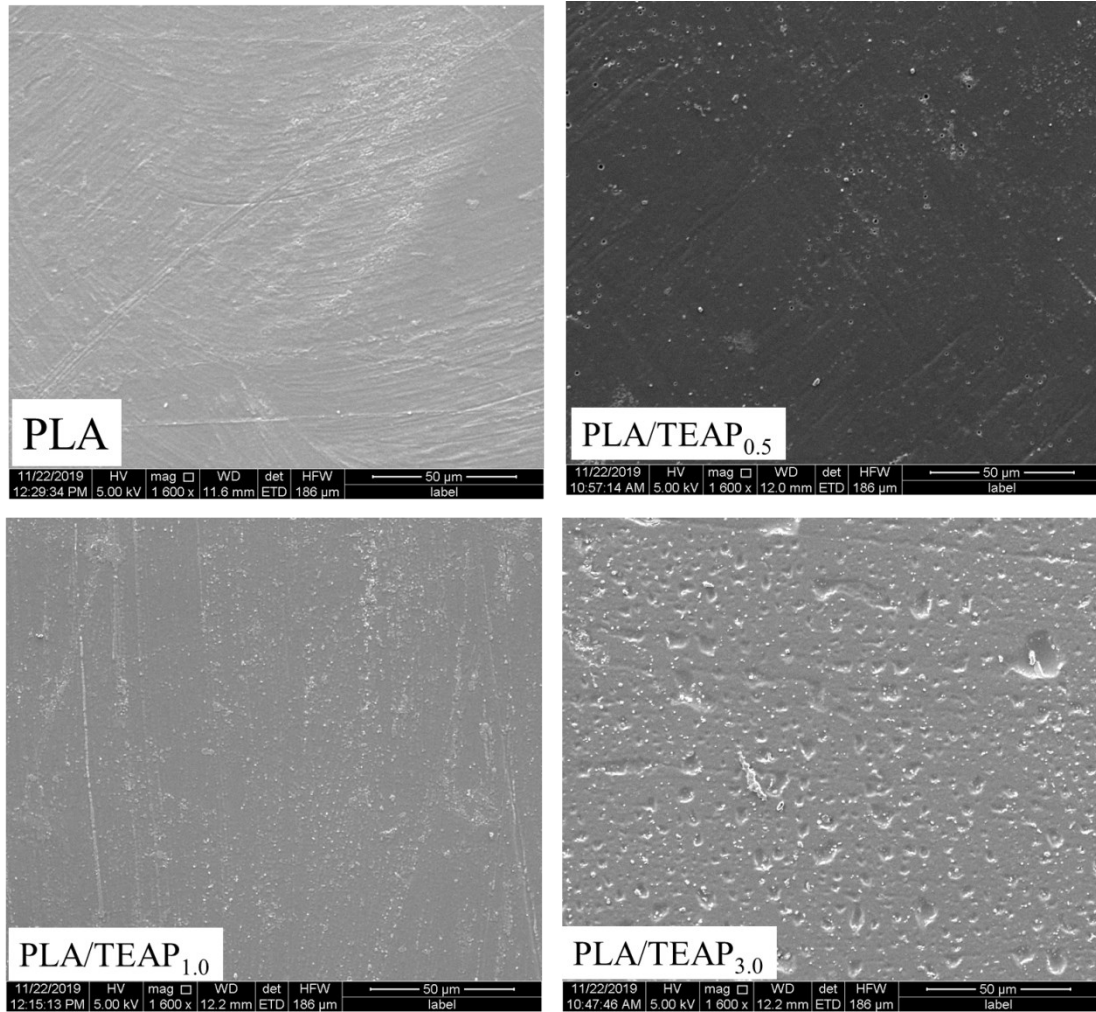

**Fig.S1** SEM images for the hot pressed surfaces of samples
